# Supplementary material for: Human TRA2A determines influenza A virus host adaptation by regulating viral mRNA splicing
Source: PubMed Central journal article supplement — Sci Adv. 2020 Jun 19;6(25):eaaz5764. doi: 10.1126/sciadv.aaz5764 (PMC7304988; doi:10.1126/sciadv.aaz5764), 2020-06-19
Supplement: aaz5764_SM.pdf [file aaz5764_SM.pdf]

[advances.sciencemag.org/cgi/content/full/6/25/eaaz5764/DC1](https://advances.sciencemag.org/cgi/content/full/6/25/eaaz5764/DC1)

## Supplementary Materials for

### **Human TRA2A determines influenza A virus host adaptation by regulating viral mRNA splicing**

Yinxing Zhu, Ruifang Wang, Luyao Yu, Huimin Sun, Shan Tian, Peng Li, Meilin Jin,  
Huanchun Chen, Wenjun Ma, Hongbo Zhou\*

\*Corresponding author. Email: [hbzhou@mail.hzau.edu.cn](mailto:hbzhou@mail.hzau.edu.cn)

Published 19 June 2020, *Sci. Adv.* **6**, eaaz5764 (2020)  
DOI: [10.1126/sciadv.aaz5764](https://doi.org/10.1126/sciadv.aaz5764)

#### **This PDF file includes:**

Figs. S1 to S9  
Table S1

## SUPPORTING INFORMATION

### Supplementary Figures

**A**

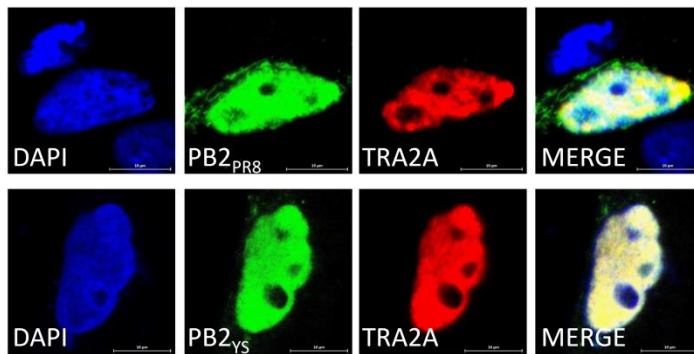

**B**

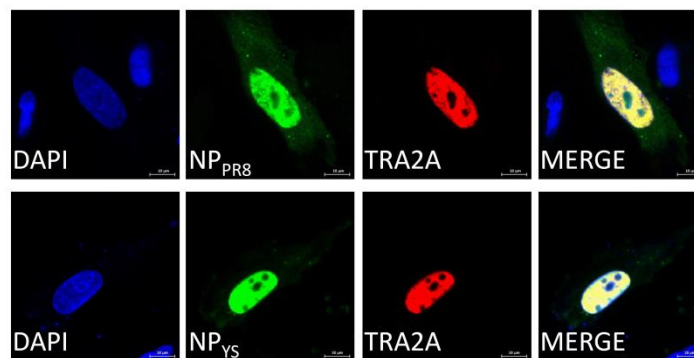

**fig. S1. TRA2A colocalizes with PB2 and NP protein in nucleus. (A, B)** A549 cells were cotransfected with the HA-TRA2A and Flag-PB2<sub>YS</sub> or Flag-PB2<sub>PR8</sub> (A). A549 cells were cotransfected with the HA-TRA2A and Flag-NP<sub>YS</sub> or Flag-NP<sub>PR8</sub> (B). After 24 h, cells were fixed and stained with the anti-HA and the anti-Flag antibody, and then visualized by confocal microscopy. The image is representative of 20 cells. Scale bar, 10  $\mu$ m.

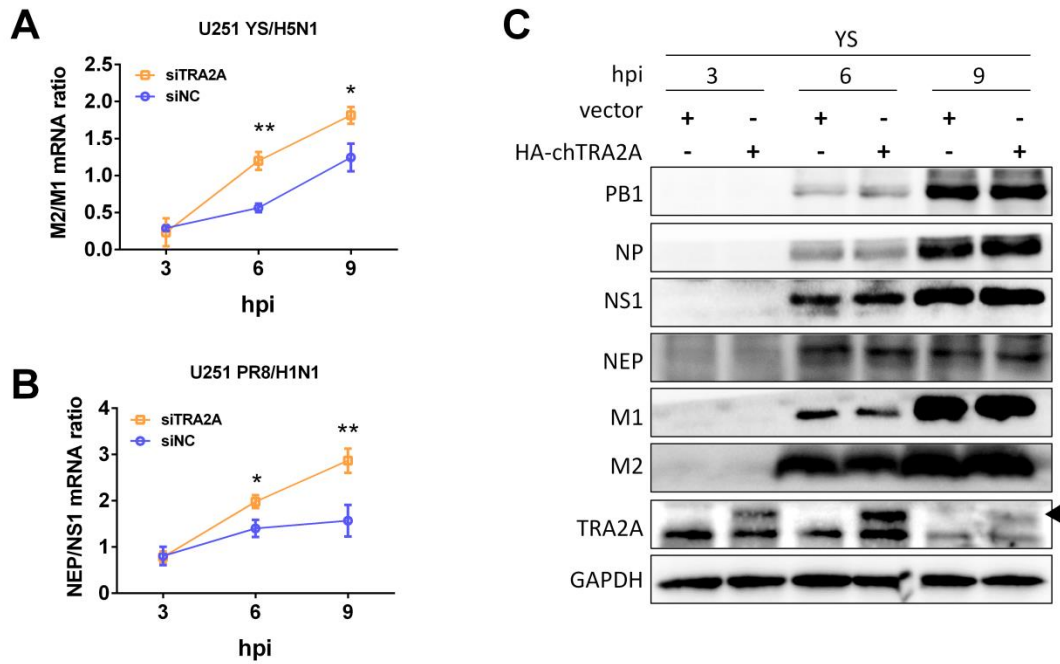

**fig. S2. huTRA2A regulates viral mRNA splicing.** (A, B) U251 cells were transfected with siNC or siTRA2A for 24 h, then infected with YS or PR8 virus at an MOI of 5. M2/M1 (A) and NEP/NS1 (B) mRNA levels were analyzed by RT-qPCR. (C) A549 cells were transfected with pCAGGS vector or HA-chTRA2A plasmid for 24 h, then infected with YS virus at an MOI of 5. Cell lysates were analyzed by western blot. \*,  $p < 0.05$ ; \*\*,  $p < 0.01$ .

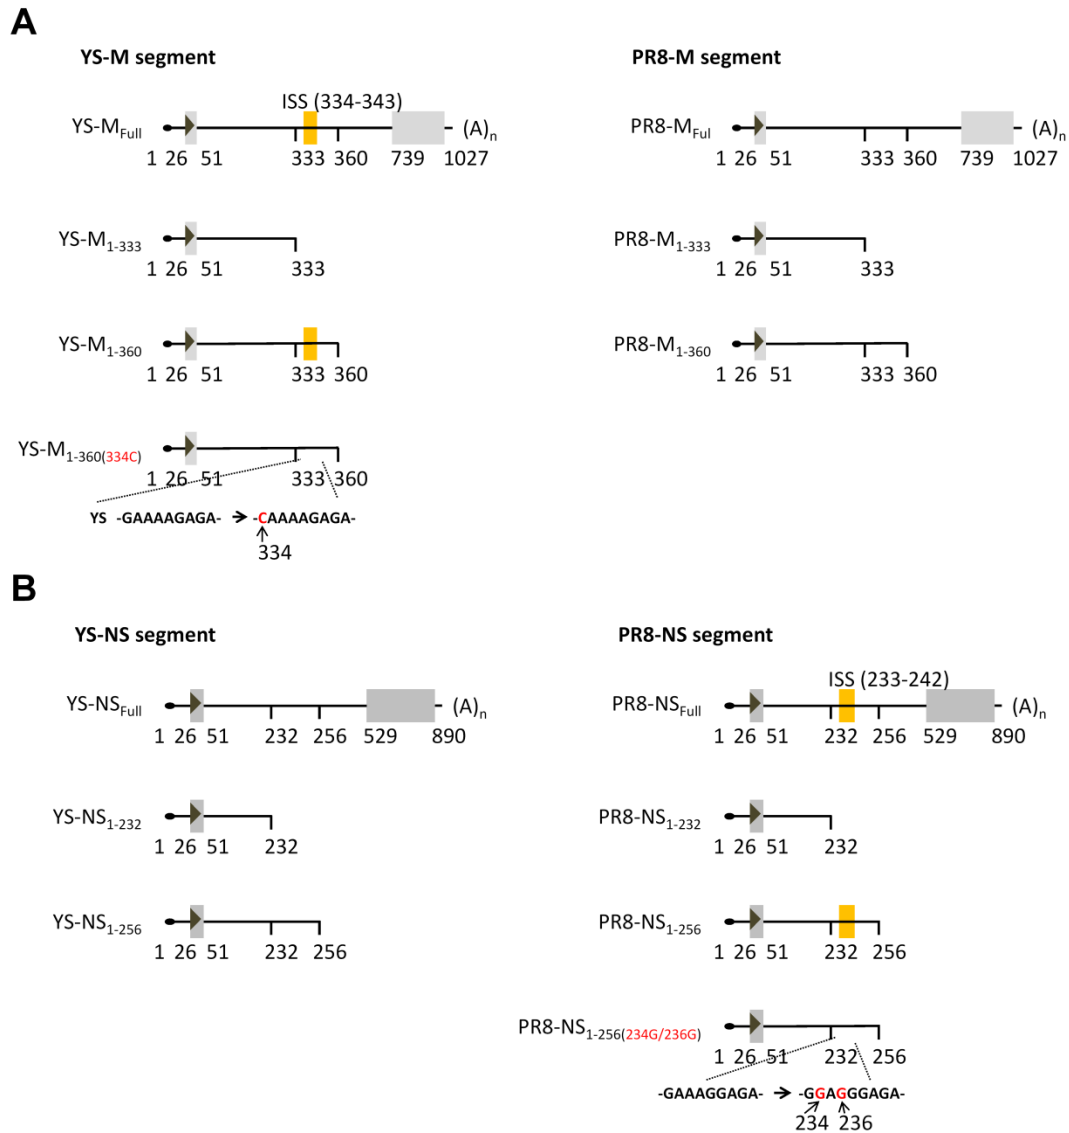

**fig. S3. Truncations of YS-M/NS and PR8-M/NS segment.** (A, B) Diagrams of M (A) and NS (B) segment-derived RNA substrates used for RNA pulldown assays. Names of each probe are indicated on the left. Boxes denote exons (not including the orange boxes) and the lines denote introns. Mutations of WT nucleotides are in red. The ISS motif is orange.

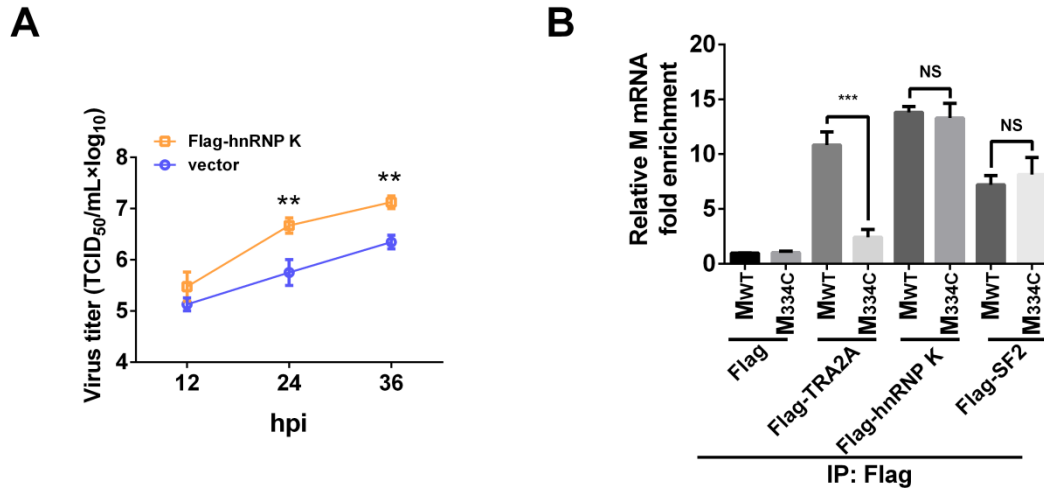

**fig. S4. SR and hnRNP family proteins in RNA binding and regulation of avian virus replication.** (A) A549 cells transfected with indicated plasmids for 24 h and then infected with either the wild type or mutant of YS virus at an MOI 0.01 for the indicated time periods. The growth curves were determined by TCID<sub>50</sub> analysis on MDCK cells. (B) HEK 293T cells were co-transfected with indicated plasmids with a pol-II driven M<sub>WT</sub> or M<sub>334C</sub> mutant plasmid. mRNAs were purified with the Flag antibody. The purified RNAs were then analyzed by specific RT-qPCR assay.

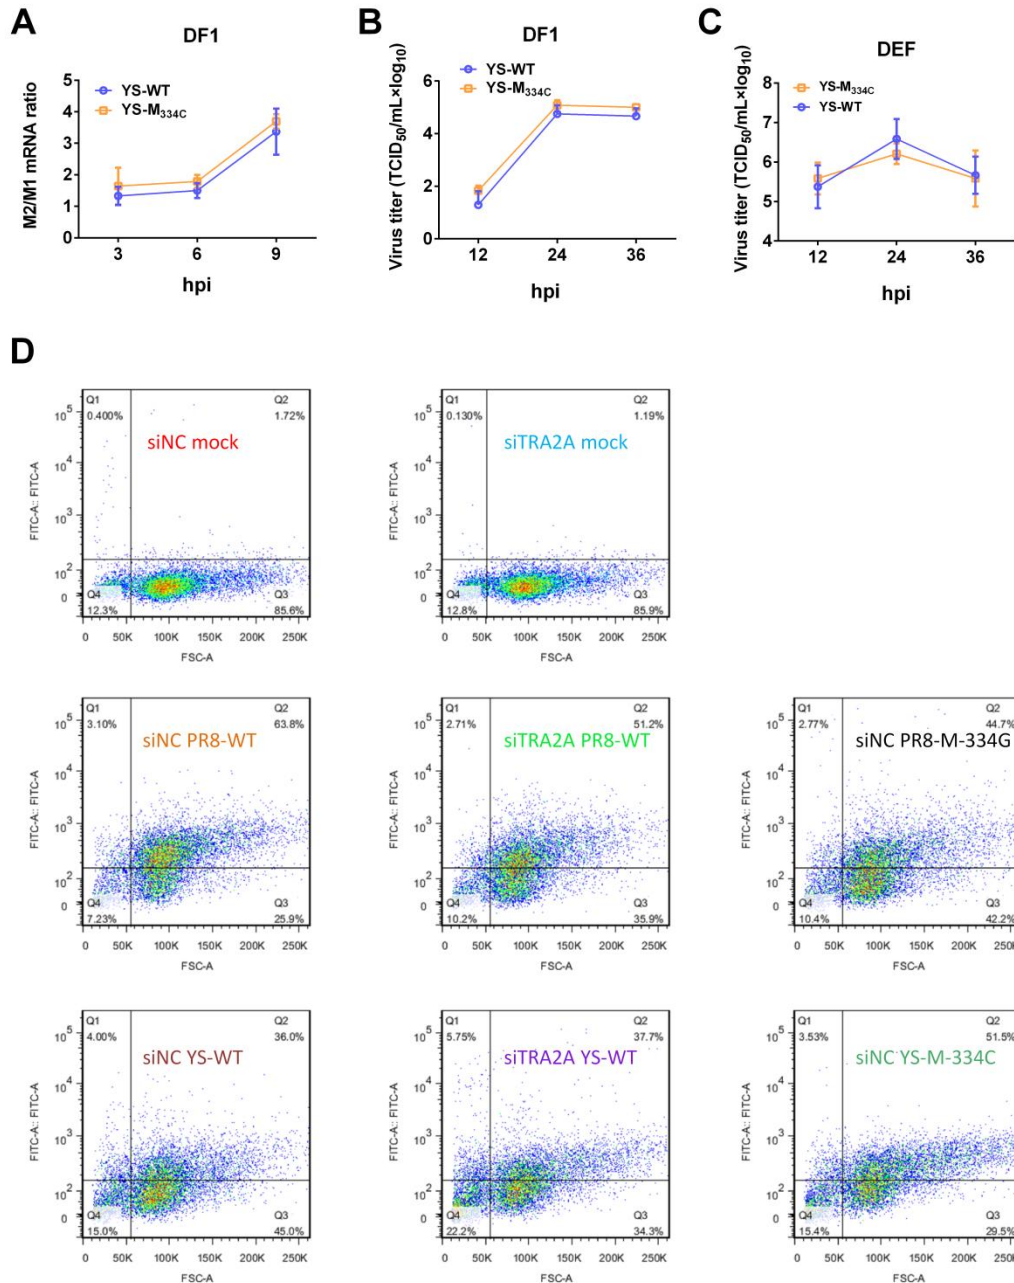

**fig. S5. Avian TRA2A did not change YS virus replication and mRNA splicing.** (A) DF1 cells were infected with the YS-WT or YS-M<sub>334G</sub> virus at an MOI of 5, the total RNA was isolated and analyzed by specific RT-qPCR targeting to M1 or M2 mRNA. Ratios of M2/M1 mRNA over time are presented. (B, C) DF1 and DEF cells were infected with the YS-WT or YS-M<sub>334G</sub> virus at an MOI of 0.01 for the indicated time periods. The growth curves were determined by TCID<sub>50</sub> analysis on MDCK cells. (D) A549 cells were transfected with siNC or siTRA2A for 24 h, then infected with either WT or mutant YS or PR8 virus for 6 hours. Cells were stained with rabbit anti-HA

antibody followed by FITC-goat anti-rabbit IgG, and analyzed by flow cytometry (Results summarized in Fig. 5K).

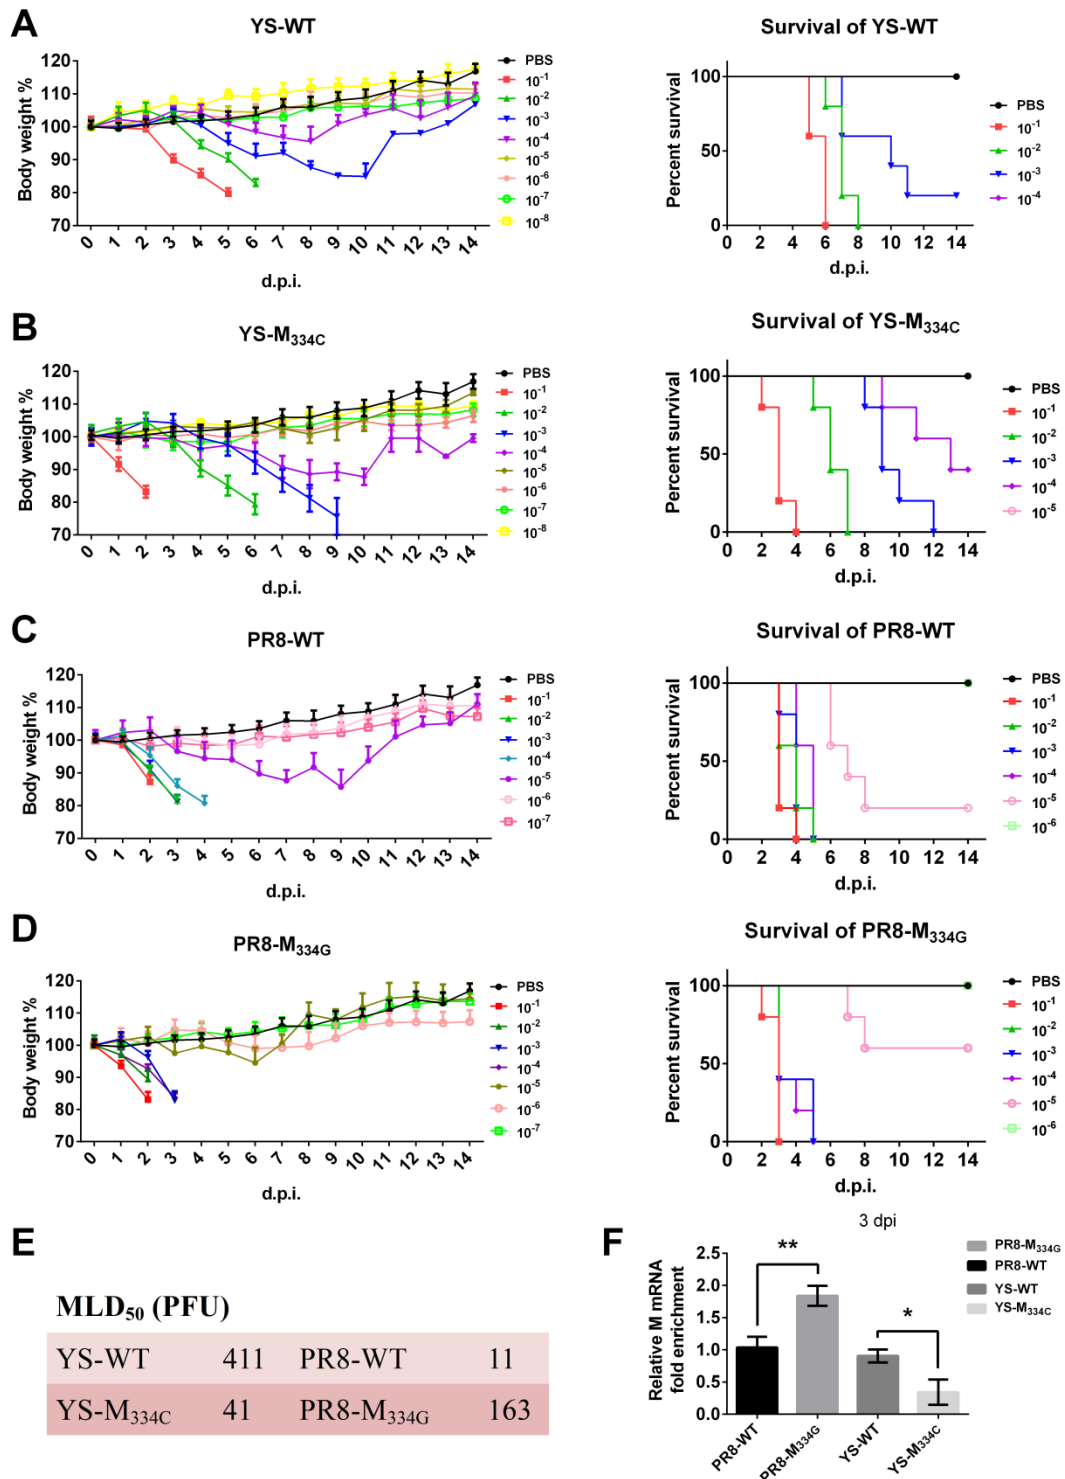

**fig. S6. MLD<sub>50</sub> of the WT and M-334 mutation of PR8 and YS viruses. (A-D)** Weight loss of mortality of mice infected with same doses of WT and their mutated viruses. Six-week-old BALB/c mice were intranasally infected with 10-fold serially

diluted (same dose) of wild-type (WT) or their mutants of PR8 or YS. Body weight (left) and survival (right) were monitored daily for two weeks (n=5). **(E)** MLD<sub>50</sub> of WT and mutant viruses. MLD<sub>50</sub> was calculated by the Reed and Muench method. **(F)** mRNA in murine lungs were purified with either the control IgG or the TRA2A antibody. The purified RNAs were then analyzed by specific RT-qPCR assay. \*, p < 0.05; \*\*, p < 0.01.



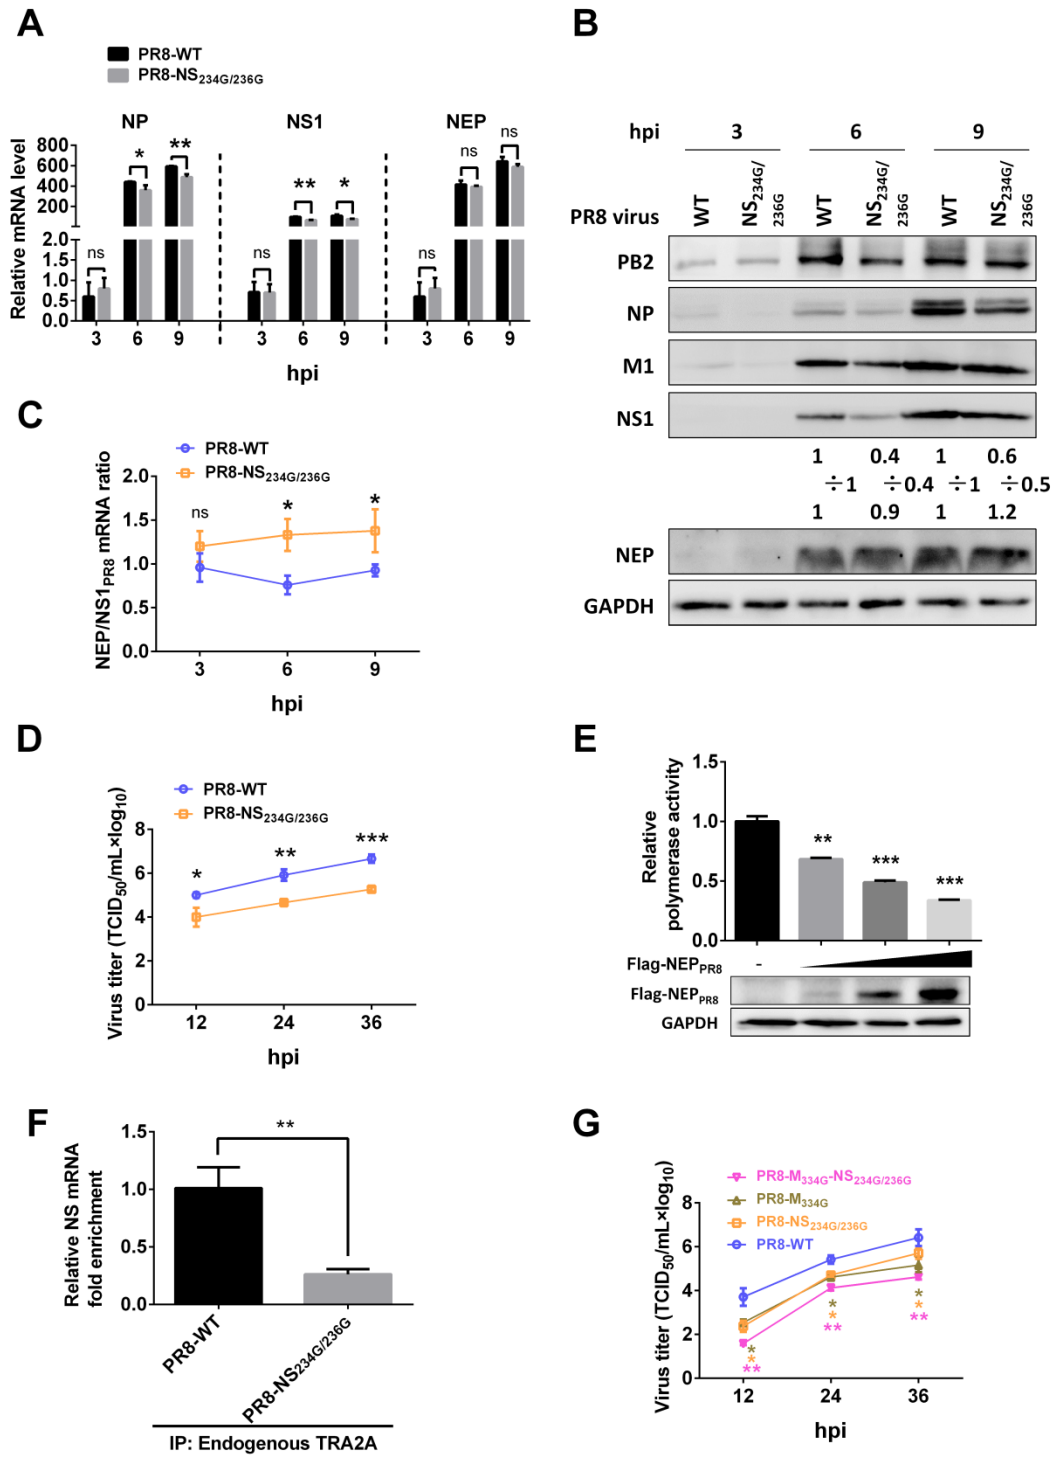

**fig. S7. NS-234/236 mutations or double mutations in both M and NS segments alter PR8 virus replication and mRNA splicing.** (A-C) A549 cells were infected with the PR8-WT or PR8-NS<sub>234G/236G</sub> virus, total RNA was isolated and analyzed by RT-qPCR with primers specific to NP, NS1 and NEP mRNAs (A). Cells lysates were

subjected to western blotting analysis using antibodies against respective influenza virus proteins. GAPDH was used as the loading control. Each protein band was quantified by ImageJ and normalized to GAPDH levels (B). Ratios of NEP to NS1 mRNA (C) over time were presented. (D) A549 cells were infected with indicated virus at an MOI of 0.01, virus titers were determined by TCID<sub>50</sub> assay on MDCK cells at indicated time points. (E) HEK 293T cells were transfected with indicated plasmids. Cells were lysed at 24 hpi, and firefly luciferase and Renilla luciferase activities were determined with the Dual-Luciferase reporter assay system. (F) A549 cells were infected with the wild type or their mutants of PR8 virus, and the mRNA were pulled-down with the control IgG or TRA2A antibody. The RNAs were then analyzed by RT-qPCR to determine the NEP/NS1 ratio. (G) A549 cells were infected with indicated viruses at an MOI of 0.01, virus titers were determined by TCID<sub>50</sub> assay on MDCK cells at indicated time points. Means  $\pm$  SD (error bars) of three independent experiments are indicated. ns, not significant; \*,  $p < 0.05$ ; \*\*,  $p < 0.01$ ; \*\*\*,  $p < 0.001$ .

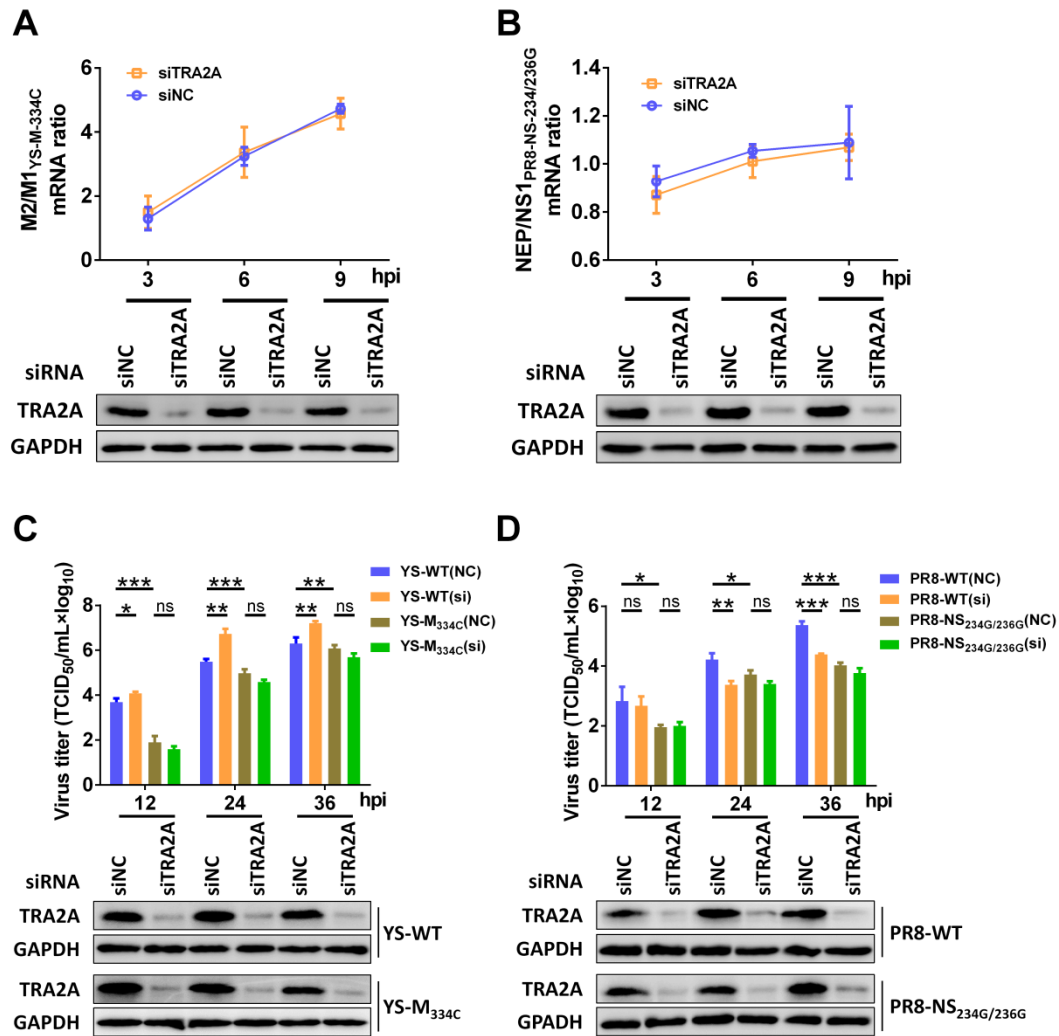

**fig. S8. TRA2A does not regulate the ISS mutated mRNA splicing and affects virus replication of ISS mutant viruses.** (A, B) A549 cells were transfected with either siNC or siTRA2A for 24 h, and then infected with the YS-M<sub>334C</sub> (A) or PR8-NS<sub>234G/236G</sub> (B) virus at an MOI of 5. The total RNAs were measured by RT-qPCR and the NEP/NS1 and M2/M1 mRNA ratios were also calculated. Cell lysates were collected at 3, 6, and 9 hpi, and subjected to western blotting analysis. (C, D) A549 cells were transfected with either siNC or siTRA2A for 24 h, and then infected with the indicated virus at MOI of 0.01. Virus titers were determined at 12, 24, and 36 hpi. Cell lysates were collected and subjected to western blotting analysis. Data were represented as means ± SD (error bars) of at least three independent experiments. ns, not significant; \*, p<0.05; \*\*, p<0.01; \*\*\*, p<0.001.

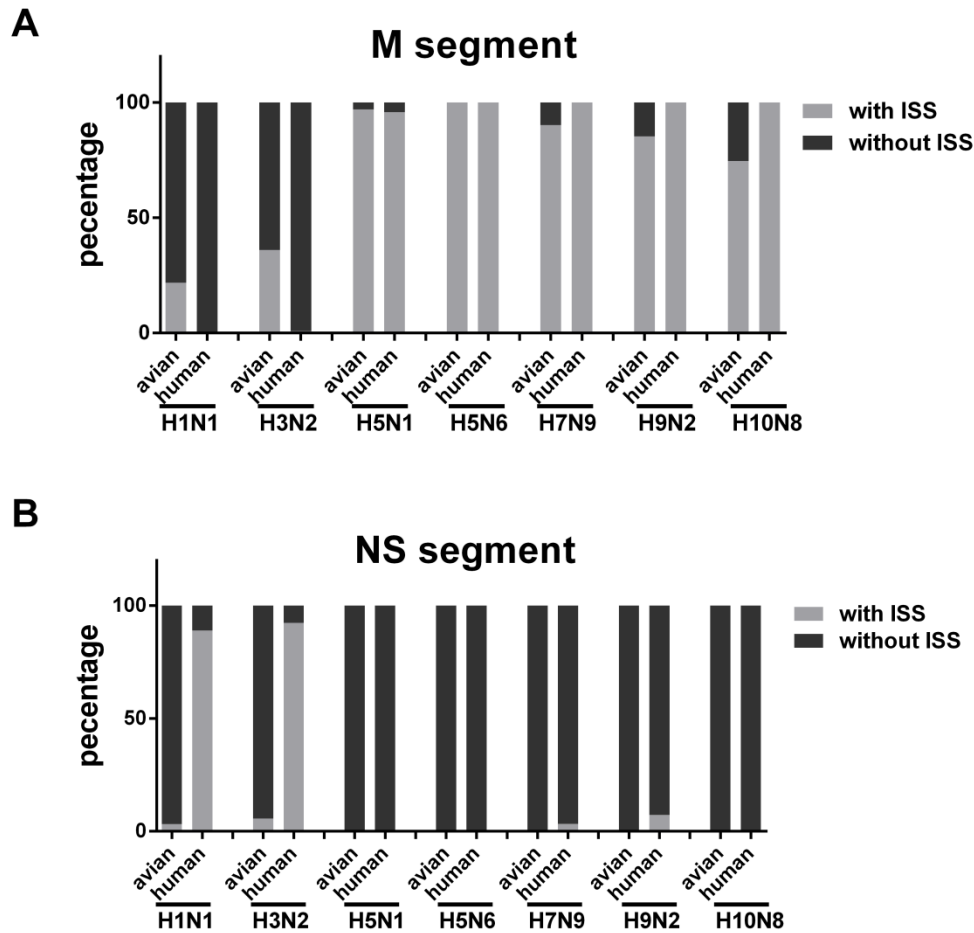

**fig. S9. Analysis of ISS in M and NS segments of IAV. (A)** The ratio of ISS in M segment (with ISS number/without ISS number/total of numbers analyzed) in each analyzed subtype of IAVs isolated from human and avian species. Both human H1N1 (42/9018/9060), H3N2 (76/8457/8533), H5N1 (162/3/165), H5N6 (3/0/3), H7N9 (80/0/80), H9N2 (13/0/13), and H10N8 (3/0/3), and avian H1N1 (90/321/411), H3N2 (93/165/258), H5N1 (1799/59/1858), H5N6 (213/0/213), H7N9 (305/33/338), H9N2 (1238/212/1450), H10N8 (77/35/102) viruses were analyzed. **(B)** The ratio of ISS in NS segment (with ISS number/without ISS number/total of numbers analyzed) in each analyzed subtype of IAVs isolated from human and avian species. Both human H1N1 (6772/839/7611), H3N2 (7460/619/8079), H5N1 (0/186/186), H5N6 (0/27/27), H7N9 (3/93/96), H9N2 (1/13/14), and H10N8 (0/4/4), and avian H1N1 (14/421/435), H3N2 (16/266/282), H5N1 (0/2002/2002), H5N6 (0/219/219), H7N9 (0/348/348), H9N2 (9/1749/1458), H10N8 (0/73/73) viruses were analyzed.

**Table S1. Primers, si-RNA and probes**

---

| <b>Primers for qPCR</b> |                         |
|-------------------------|-------------------------|
| Name                    | Sequence                |
| TRA2A-F                 | TCTCGTAGTCCATCAAGGGTTTC |
| TRA2A-R                 | GCCAGTATGTCTTCTCCGGTTAG |
| YS-NS1-F                | GGAAGAGGCAACACTCTTGG    |
| YS-NS1-R                | TTTCTGCTTGGGCATGAGCA    |
| YS-NEP-F                | CTGTGTCAAGCTTTCAGGAC    |
| YS-NEP-R                | AGTCTCCTATCCTCATCACT    |
| YS-M1-F                 | CGCGCAGAAACTTGAAGATG    |
| YS-M1-R                 | TGGATCTCCATTTCCATTTA    |
| YS-M2-F                 | GCACTTGATATTGTGGATTC    |
| YS-M2-R                 | CAATTCTATGTTGACAAAATG   |
| YS-NP-F                 | GCGTCTCAAGGCACCAAAC     |
| YS-NP-R                 | AGCCTCCCTTCATAGTCAC     |
| YS-PB1-F                | TGAAACACTAGCGAGGAG      |
| YS-PB1-R                | ATCATTGCCAGAAACATC      |
| PR8-NS1-F               | GGAAGGGGCAGTACTCTCGG    |
| PR8-NS1-R               | TTTCTGCTTGGGTATGAGCA    |
| PR8-NEP-F               | CTGTGTCAAGCTTTCAGGAC    |
| PR8-NEP-R               | AGTCTCCCATCCTTATCACT    |
| PR8-M1-F                | CGCACAGAGACTTGAAGATG    |
| PR8-M1-R                | TGGATCCCCGTTCCCATTA     |
| PR8-M2-F                | GCACTTGACATTGTGGATTC    |
| PR8-M2-R                | GCACTTGACATTGTGGATTC    |
| PR8-NP-F                | GCGTCTCAAGGCACCAAAC     |
| PR8-NP-R                | AACCGTCCCTCATAATCAC     |
| PR8-PB1-F               | ACTTACTGGTGGGATGGT      |
| PR8-PB1-R               | CTGAAATTGGCAACAAAC      |

---

---

|              |                      |
|--------------|----------------------|
| GAPDH-F      | GCAAAGGCTGTGGGCAAGG  |
| GAPDH-R      | GGAGGAGTGGGTGTCGCTG  |
| U87 scaRNA-F | ATGGGATCATGGAGCAGCTG |
| U87 scaRNA-R | TCACACCCATGACTGCCACT |

**Primers for semi-quantitative PCR**

|              |                        |
|--------------|------------------------|
| M1/M2-F      | TTCTAACCGAGGTCGAAAC    |
| M1-R (400bp) | CCCATCCTGTTGTATATGAG   |
| M2-R (246bp) | CCACAGCACTCTGCTGTTCCCT |

**Primers for amplification**

|                   |                                |
|-------------------|--------------------------------|
| TRA2A-F           | CGGGATCCG ATGAGTGATGTGGAGGAAA  |
| TRA2A-R           | CCCAAGCTT ATAGCGTCTTGGGCTGT    |
| pCDNA3-M-F        | GCGAATTC GTAATACGACTCACTATAGGG |
| pCDNA3-M(full)-R  | GCCTCGAG AGTAGAAACAAGGTAGTTTTT |
| pCDNA3-M360-R     | GCCTCGAG GCCCCATGGAATGTTAT     |
| pCDNA3-YS-M333-R  | GCCTCGAG TAAGCTATATAAGAAGCT    |
| pCDNA3-PR8-M333-R | GCCTCGAG TTAAACTGTATAGGAAGCT   |

**RNA oligonucleotides for RNA pull-down and EMSA**

|                     |                       |
|---------------------|-----------------------|
| YS-M-332-351        | CUGAAAAGAGAAAUAACAUII |
| PR8-M-332-351       | CUCAAGAGGGAGAUACAUII  |
| YS-NS-223-242       | CUGGAGGAGGAGUCUGAUGA  |
| PR8-NS-223-242      | CUGAAAGGAGAAUCCGAUGA  |
| YS-M-332-351(334C)  | CUCAAAAGAGAAAUAACAUII |
| PR8-M-332-351(334G) | CUGAAGAGGGAGAUACAUII  |
| CU                  | CUUCCUCUCCUUCUCUCC    |

**Si-RNA**

|                        |                        |
|------------------------|------------------------|
| TRA2A-sense(5'-3')     | GCCUCAGUUUGUACACAACCTT |
| TRA2A-antisense(5'-3') | GUUGUGUACAAACUGAGGCTT  |

---
